# Supplementary material for: Experimental Investigation of Metal-Based Calixarenes as Dispersed Catalyst Precursors for Heavy Oil Hydrocracking
Source: MDPI journal article supplement (doi:10.3390/catal12101255), 2022-10-17
Supplement: s1 [file s1]

# Supplementary Materials

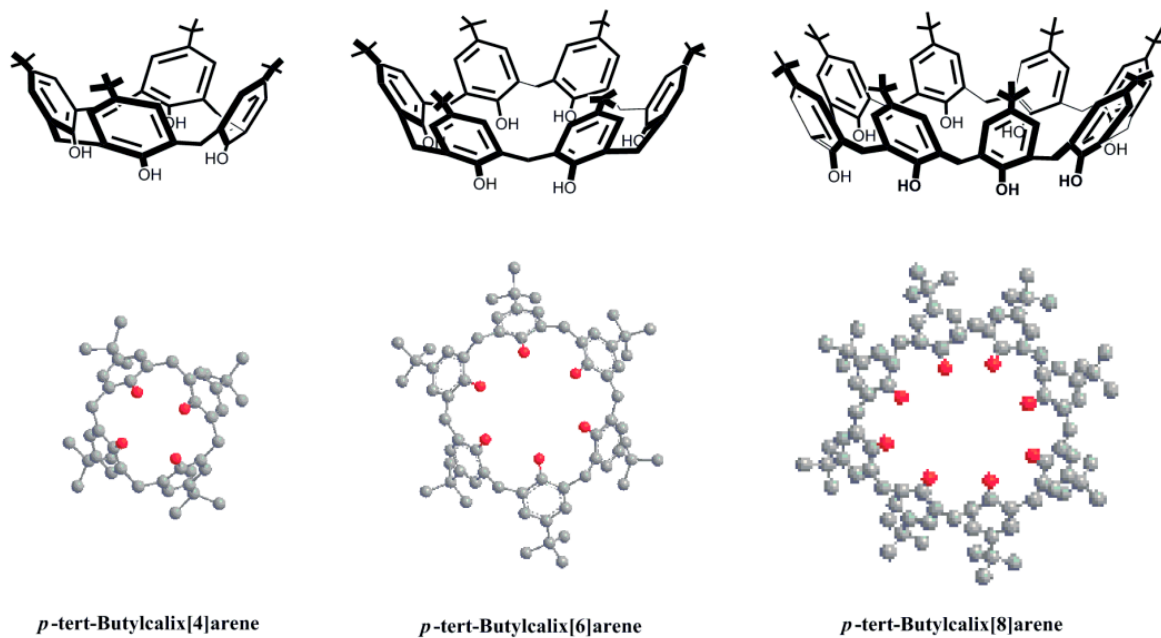

Figure S1. Structures of *p*-tert-butylcalix[n]arenes [24].

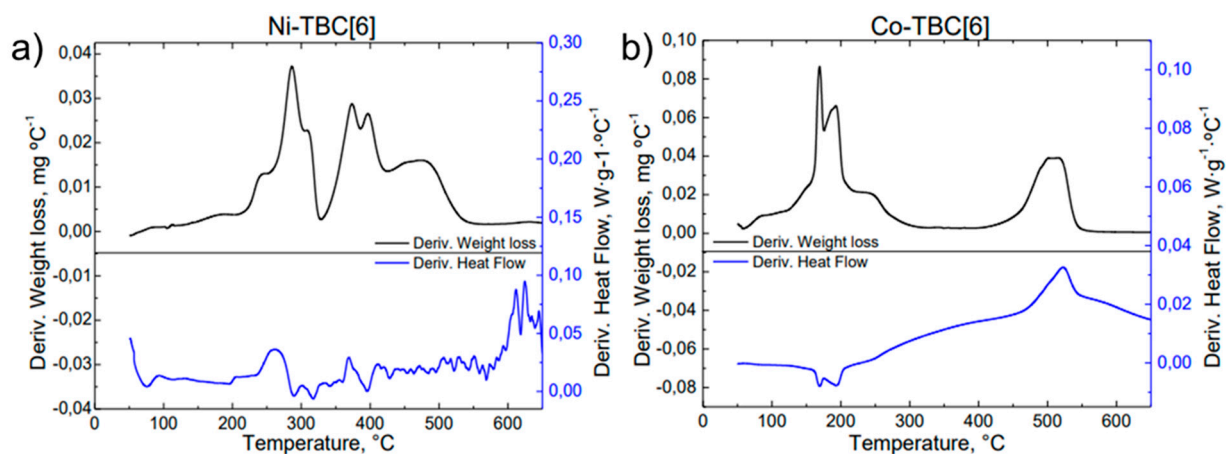

Figure S2. Differential thermogravimetric (DTG) and Differential heat flow profiles of a) Ni-TBC[6] and b) Co-TBC[6].

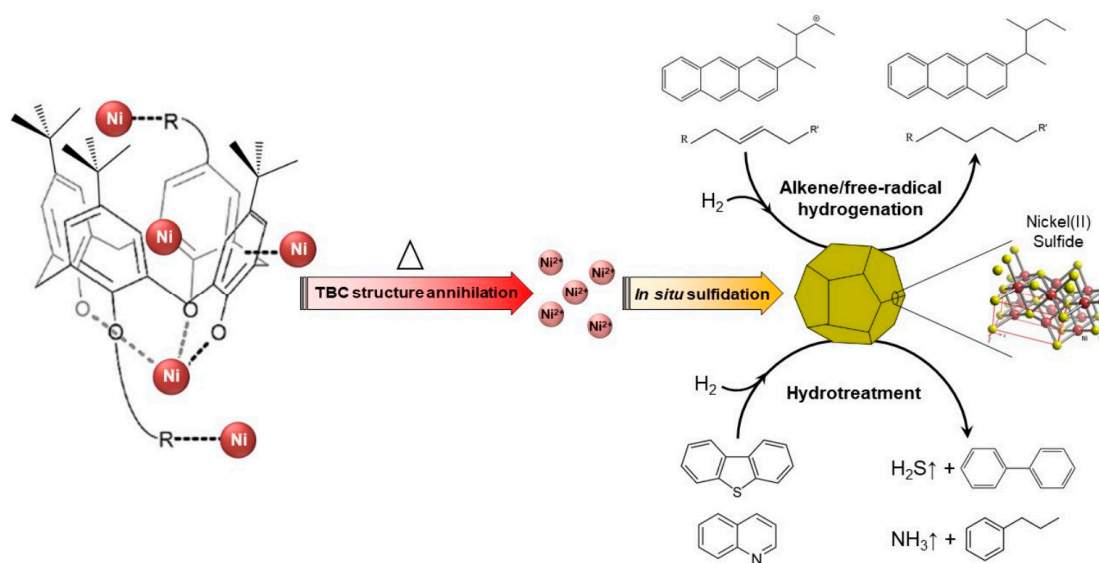

**Figure S3.** Mechanism of in situ sulfidation to form the active metal sulfide from metal-based calixarenes.

**Table S1.** Features and Advantages Offered by Calixarene [11].

| Features                              | Subsequent advantages                |
|---------------------------------------|--------------------------------------|
| Inexpensive and easily synthesized    | Milligram quantities                 |
| Ability to be functionalized          | Solubility control (including water) |
| Ability to incorporate chirality      | Enantio-discrimination               |
| Presence of cavity                    | Multiple-substrate recognition       |
| Multiple binding sites                | Cooperative effects                  |
| Ability to be fixed on solid supports | Heterogeneous catalysis              |

**Table S2.** Physical and chemical properties of the vacuum gas oil (VGO).

| Properties                          | Value                              |
|-------------------------------------|------------------------------------|
| Appearance                          | soft but solid at room temperature |
| Color                               | greenish dark brown                |
| Density (g/cm <sup>3</sup> at 15°C) | 0.892                              |
| Molecular weight                    | 442.7                              |
| Initial boiling point, IBP (°C)     | 343                                |
| Final boiling point, FBP (°C)       | 641                                |
| Elemental analysis (wt.%)           |                                    |
| Carbon                              | 85.10                              |
| Hydrogen                            | 11.95                              |
| Sulfur                              | 2.667                              |
| Nitrogen                            | 0.215                              |
| HPLC analysis (wt.%)                |                                    |
| Saturates                           | 13.3                               |
| Aromatics                           | 68.1                               |
| Polars                              | 18.6                               |

**Table S3.** Temperature of peaks in DTG.

| Catalyst  | 1 <sup>st</sup> Step (°C) | 2 <sup>nd</sup> Step (°C) | 3 <sup>rd</sup> Step (°C) |
|-----------|---------------------------|---------------------------|---------------------------|
| Ni-TBC[6] | 285                       | 373                       | 474                       |
| Co-TBC[6] | 167                       | 236                       | 504                       |

**Table S4.** Characteristic peaks in DSC.

| Peak (°C) | Ni-TBC[6]        | Co-TBC[6]        |
|-----------|------------------|------------------|
| 1         | 75 <sup>a</sup>  | -                |
| 2         | -                | 168 <sup>b</sup> |
| 3         | -                | 194 <sup>b</sup> |
| 4         | 262 <sup>d</sup> | 209 <sup>d</sup> |
| 5         | 318 <sup>b</sup> | -                |
| 6         | 370 <sup>c</sup> | 523 <sup>c</sup> |
| 7         | 395 <sup>b</sup> | -                |

<sup>a</sup>glass transition<sup>b</sup>endothermic<sup>c</sup>exothermic<sup>d</sup>re-crystallization**Table S5.** Properties of the Commercial Hydrocracking Catalyst (KC-2710).

| Property                       | Unit                                                                                | Value |
|--------------------------------|-------------------------------------------------------------------------------------|-------|
| BET specific surface area      | m <sup>2</sup> /g                                                                   | 346   |
| Specific pore volume           | mL/g                                                                                | 0.37  |
| Average pore diameter          | nm                                                                                  | 4.3   |
| Specific total acidity         | μmol/g                                                                              | 844   |
| Chemical composition:          |                                                                                     |       |
| SiO <sub>2</sub>               | wt. %                                                                               | 33    |
| Al <sub>2</sub> O <sub>3</sub> | wt. %                                                                               | 38    |
| WO <sub>3</sub>                | wt. %                                                                               | 23    |
| NiO                            | wt. %                                                                               | 6     |
| Support phase                  | amorphous SiO <sub>2</sub> -Al <sub>2</sub> O <sub>3</sub> and Y zeolite (45 wt. %) |       |
